# Supplementary material for: DFT Investigation of the Molecular Properties of the Dimethylglyoximato Complexes [M(Hdmg)2] (M = Ni, Pd, Pt)
Source: MDPI journal article supplement (doi:10.3390/inorganics9060047), 2021-06-07
Supplement: s1 [file s1]

## DFT Investigation of the Molecular Properties of the Dimethylglyoximate Complexes [M(Hdmg)<sub>2</sub>] (M = Ni, Pd, Pt)

Maryam Niazi, Axel Klein\*

University of Cologne, Faculty for Mathematics and Natural Sciences, Department of Chemistry, Institute for Inorganic Chemistry, Greinstraße 6, D-50939 Köln, Germany, email: [mniazi@uni-koeln.de](mailto:mniazi@uni-koeln.de), ORCID: 0000-0003-2558-1633 (M.N.); email: [axel.klein@uni-koeln.de](mailto:axel.klein@uni-koeln.de), ORCID: 0000-0003-0093-9619 (A.K.).

### Contents

**Table S1.** Essential experimental structural parameters of [M(Hdmg)<sub>2</sub>] (M = Ni, Pd, Pt).

**Table S2.** Selected experimental and computed geometries of [Ni(Hdmg)<sub>2</sub>].

**Table S3.** Selected experimental and computed geometries of [Pd(Hdmg)<sub>2</sub>].

**Table S4.** Selected (experimental and computed) geometries of [Pt(Hdmg)<sub>2</sub>].

**Figure S1.** DFT-optimised structures in the *S*<sub>0</sub> ground state for [M(Hdmg)<sub>2</sub>] (M = Ni, Pd, Pt).

**Table S5.** The XYZ coordinates of the optimised ground state for [M(Hdmg)<sub>2</sub>] (M = Ni, Pd, Pt); M06-2X/def2TZVP/LANL2DZ ecp/CPCM(DMSO) level of theory.

**Table S6.** Compositions (%) of frontier MOs in the *S*<sub>0</sub> ground state for [M(Hdmg)<sub>2</sub>] (M = Ni, Pd, Pt).

**Figure S2.** Frontier orbital landscape in the *S*<sub>0</sub> ground state for [M(Hdmg)<sub>2</sub>] (M = Ni, Pd, Pt).

**Table S7.** Compositions (%) of frontier MOs in the *T*<sub>1</sub> excited state for [M(Hdmg)<sub>2</sub>] (M = Ni, Pd, Pt).

**Figure S3.** Frontier orbital landscape in the *T*<sub>1</sub> excited state for [M(Hdmg)<sub>2</sub>] (M = Ni, Pd, Pt).

**Figure S4.** Energy diagrams of frontier MOs for [M(Hdmg)<sub>2</sub>] (M = Ni, Pd, Pt) at the optimised *S*<sub>0</sub> and *T*<sub>1</sub> geometry; M06-2X/def2TZVP/LANL2DZ ecp/CPCM(DMSO) level of theory.

**Table S8.** Wavelengths and character of calculated transitions for [Ni(Hdmg)<sub>2</sub>].

**Table S9.** Wavelengths and character of calculated transitions for [Pd(Hdmg)<sub>2</sub>].

**Table S10.** Wavelengths and character of calculated transitions for [Pt(Hdmg)<sub>2</sub>].

**Table S1.** Essential experimental structural parameters of [M(Hdmg)<sub>2</sub>] (M = Ni, Pd, Pt) <sup>a</sup>.

|                 | O–H···O distance | O···O distance | O–H···O angle | M···M distance | rotation angle  | Reference |
|-----------------|------------------|----------------|---------------|----------------|-----------------|-----------|
|                 | /Å               | /Å             | /°            | /Å             | /° <sup>b</sup> |           |
| Ni <sup>c</sup> | -                | 2.40(2)        | -             | 3.245(3)       | 92.48(1)        | Ref. 1    |
|                 | 1.354(2)         | 2.457(4)       | 172.07(2)     | 3.237(1)       | 92.59(1)        | Ref. 2    |
|                 | -                | 2.44(2)        | -             | 3.245(5)       | 90(1)           | Ref. 3    |
| Pd              | -                | 2.59(3)        | -             | 3.26(4)        | 90(3)           | Ref. 1    |
|                 | 1.889(1)         | 2.626(4)       | 166.84(1)     | 3.250(3)       | 93.46(1)        | Ref. 4    |
| Pt              | 1.619(15)        | 2.638(19)      | 159(13)       | 3.259(1)       | 92.9(7)         | Ref. 5    |
|                 | 1.574(1)         | 2.62(2)        | 179.41(1)     | 3.256(3)       | 92.16(1)        | Ref. 4    |
|                 | -                | 3.03(6)        | -             | 3.23(1)        | 90.34(1)        | Ref. 6    |

<sup>a</sup> Experimental data from solid state structures. <sup>b</sup> Rotation of the square planar complexes within the stacks. <sup>c</sup> Values for Ni–Ni range from 3.25 to 2.90 upon pressure [7].

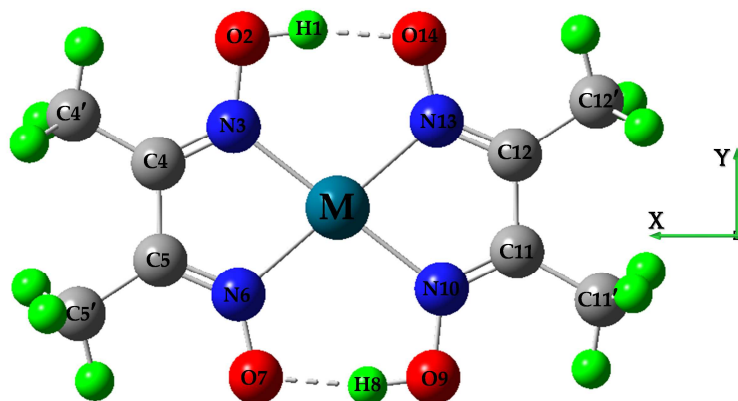

Numbering scheme for the DFT-calculated structures of  $[M(\text{Hdmg})_2]$  ( $M = \text{Ni, Pd, Pt}$ ) for Tables S2 to S4.

**Table S2.** Selected experimental and computed geometries of  $[\text{Ni}(\text{Hdmg})_2]$  <sup>a</sup>.

| Bond length / Å                                    | Exp. 1   | Exp. 2              | Exp. 3    | Calc. 1              | Calc. 2 | Our results |
|----------------------------------------------------|----------|---------------------|-----------|----------------------|---------|-------------|
| M–N <sub>3</sub>                                   | 1.85(1)  | 1.90(1)             | 1.861(3)  | 1.89                 | 1.873   | 1.912       |
| M–N <sub>6</sub>                                   | 1.85(1)  | 1.87(2)             | 1.859(3)  | 1.90                 | 1.894   | 1.912       |
| N <sub>3</sub> –O <sub>2</sub>                     | 1.36(2)  | 1.38(2)             | 1.350(4)  | 1.34                 | 1.338   | 1.345       |
| N <sub>6</sub> –O <sub>7</sub>                     | 1.35(2)  | 1.37(3)             | 1.341(4)  | 1.29                 | 1.288   | 1.303       |
| O <sub>2</sub> –H <sub>1</sub>                     | -        | -                   | 1.109(3)  | 1.04                 | 1.050   | 1.054       |
| O <sub>2</sub> ···O <sub>14</sub>                  | 2.40(2)  | 2.44(2)             | 2.457(4)  | 2.49                 | 2.477   | 2.509       |
| H <sub>1</sub> ···O <sub>14</sub>                  | -        | -                   | 1.354(2)  | 1.47                 | 1.442   | 1.455       |
| N <sub>3</sub> –C <sub>4</sub>                     | 1.30(2)  | 1.20(3)             | 1.292(5)  | 1.30                 | 1.294   | 1.280       |
| C <sub>4</sub> –C <sub>5</sub>                     | 1.54(3)  | 1.53(3)             | 1.467(5)  | 1.47                 | 1.462   | 1.486       |
| C <sub>5</sub> –N <sub>6</sub>                     | 1.29(2)  | 1.25(3)             | 1.292(4)  | 1.30                 | 1.305   | 1.289       |
| C <sub>4</sub> –C <sub>4</sub> '                   | 1.50(3)  | 1.46(4)             | 1.489(5)  | 1.49                 | 1.487   | 1.487       |
| C <sub>5</sub> –C <sub>5</sub> '                   | 1.53(3)  | 1.51(4)             | 1.481(5)  | 1.49                 | 1.486   | 1.489       |
| Angles / °                                         | Exp. 1   | Exp. 2 <sup>b</sup> | Exp. 3    | Calc. 1 <sup>c</sup> | Calc. 2 | Our results |
| N <sub>3</sub> –M–N <sub>6</sub>                   | 83.1(1)  | 80                  | 82.4(1)   | -                    | 83.0    | 82.4        |
| N <sub>6</sub> –M–N <sub>10</sub>                  | 96.9(1)  | 100                 | 97.6(1)   | -                    | 97.0    | 97.3        |
| M–N <sub>3</sub> –C <sub>4</sub>                   | 118.0(1) | 121                 | 116.3(2)  | -                    | 115.4   | 115.2       |
| M–N <sub>6</sub> –C <sub>5</sub>                   | 117.4(1) | 117                 | 116.6(2)  | -                    | 114.8   | 114.9       |
| N <sub>3</sub> –O <sub>2</sub> –H <sub>1</sub>     | -        | 102                 | 101.5(2)  | -                    | 103.3   | 102.7       |
| C <sub>4</sub> –N <sub>3</sub> –O <sub>2</sub>     | 117.5(1) | 121                 | 119.9(3)  | -                    | 120.3   | 121.3       |
| C <sub>5</sub> –N <sub>6</sub> –O <sub>7</sub>     | 119.7(1) | 121                 | 119.5(3)  | -                    | 121.7   | 122.5       |
| O <sub>2</sub> –H <sub>1</sub> ···O <sub>14</sub>  | -        | -                   | 172.1(18) | -                    | 167.0   | 169.7       |
| N <sub>13</sub> –O <sub>14</sub> ···H <sub>1</sub> | -        | 98                  | 101.1(2)  | -                    | 104.3   | 102.6       |
| C <sub>5</sub> –C <sub>4</sub> –N <sub>3</sub>     | 110.0(1) | 109                 | 112.5(3)  | -                    | 113.5   | 113.8       |
| C <sub>4</sub> –C <sub>5</sub> –N <sub>6</sub>     | 111.5(1) | 113                 | 112.2(3)  | -                    | 113.3   | 113.7       |
| C <sub>5</sub> –C <sub>4</sub> –C <sub>4</sub> '   | 125.2(1) | 124                 | 124.3(3)  | -                    | 123.2   | 122.1       |
| C <sub>4</sub> –C <sub>5</sub> –C <sub>5</sub> '   | 124.0(1) | 121                 | 125.0(3)  | -                    | 125.5   | 124.1       |

<sup>a</sup> Exp. 1: experimental data from Ref. 1. Exp.2: experiment data from Ref. 3. Exp.3: experimental data from Ref. 2. Calc. 1: calculated data from Ref. 8. Calc. 2: calculated data from Ref. 9. Our results: solvent: DMSO(conductor-like polarizable continuum model = CPCM) Ref. 10,11; functional: M06-2X, Ref. 12; basis set: def2TZVP, Ref. 13 for C, H, N, O and LANL2DZ ecp(10/18) for Ni, Ref. 14-17. <sup>b</sup> No standard deviations for angles were provided. <sup>c</sup> No angles were provided.

**Table S3.** Selected experimental and computed geometries of [Pd(Hdmg)<sub>2</sub>]<sup>a</sup>.

| Bond length / Å                                    | Exp. 1   | Exp. 2   | Calc. | Our results |
|----------------------------------------------------|----------|----------|-------|-------------|
| M–N <sub>3</sub>                                   | 1.93(2)  | 1.967(3) | 1.989 | 2.016       |
| M–N <sub>6</sub>                                   | 1.99(2)  | 1.962(4) | 2.000 | 2.014       |
| N <sub>3</sub> –O <sub>2</sub>                     | 1.37(3)  | 1.353(1) | 1.349 | 1.352       |
| N <sub>6</sub> –O <sub>7</sub>                     | 1.33(3)  | 1.321(1) | 1.275 | 1.288       |
| O <sub>2</sub> –H <sub>1</sub>                     | -        | 0.752(1) | 1.014 | 1.009       |
| O <sub>2</sub> ···O <sub>14</sub>                  | 2.59(3)  | 2.626(4) | 2.669 | 2.713       |
| H <sub>1</sub> ···O <sub>14</sub>                  | -        | 1.889(1) | 1.671 | 1.704       |
| N <sub>3</sub> –C <sub>4</sub>                     | 1.31(3)  | 1.281(1) | 1.295 | 1.281       |
| C <sub>4</sub> –C <sub>5</sub>                     | 1.47(4)  | 1.472(1) | 1.467 | 1.485       |
| C <sub>5</sub> –N <sub>6</sub>                     | 1.31(3)  | 1.299(1) | 1.314 | 1.297       |
| C <sub>4</sub> –C <sub>4</sub> '                   | 1.55(4)  | 1.489(1) | 1.489 | 1.489       |
| C <sub>5</sub> –C <sub>5</sub> '                   | 1.54(4)  | 1.486(1) | 1.489 | 1.491       |
| Angles / °                                         | Exp. 1   | Exp. 2   | Calc. | Our results |
| N <sub>3</sub> –M–N <sub>6</sub>                   | 80.4(1)  | 79.9(1)  | 80.0  | 79.4        |
| N <sub>6</sub> –M–N <sub>10</sub>                  | 99.6(1)  | 100.2(1) | 100.0 | 100.6       |
| M–N <sub>3</sub> –C <sub>4</sub>                   | 116.6(1) | 116.3(2) | 115.6 | 115.5       |
| M–N <sub>6</sub> –C <sub>5</sub>                   | 115.1(1) | 115.7(2) | 114.8 | 115.0       |
| N <sub>3</sub> –O <sub>2</sub> –H <sub>1</sub>     | -        | 106.7(1) | 103.4 | 103.2       |
| C <sub>4</sub> –N <sub>3</sub> –O <sub>2</sub>     | 120.9(1) | 121.8(3) | 121.6 | 122.0       |
| C <sub>5</sub> –N <sub>6</sub> –O <sub>7</sub>     | 124.2(1) | 123.0(3) | 125.2 | 125.5       |
| O <sub>2</sub> –H <sub>1</sub> ···O <sub>14</sub>  | -        | 166.8(1) | 167.3 | 168.0       |
| N <sub>13</sub> –O <sub>14</sub> ···H <sub>1</sub> | -        | 103.2(1) | 106.3 | 106.4       |
| C <sub>5</sub> –C <sub>4</sub> –N <sub>3</sub>     | 114.2(1) | 114.1(3) | 115.1 | 115.1       |
| C <sub>4</sub> –C <sub>5</sub> –N <sub>6</sub>     | 113.7(1) | 114.0(3) | 114.6 | 114.9       |
| C <sub>5</sub> –C <sub>4</sub> –C <sub>4</sub> '   | 122.5(1) | 123.5(3) | 122.2 | 121.1       |
| C <sub>4</sub> –C <sub>5</sub> –C <sub>5</sub> '   | 125.3(1) | 124.7(3) | 123.6 | 122.0       |

<sup>a</sup> Exp.1: experimental data from Ref. 1. Exp.2: experimental data from Ref. 4. Calc.1: calculated data from Ref. 9. Our results: solvent: DMSO(CPCM), Ref 10,11; functional: M06-2X, Ref. 12; basis set: def2TZVP, Ref. 13 for C, H, N, O and LANL2DZ ecp(28/28) for Pd, Ref. 14-17.

**Table S4.** Selected (experimental and computed) geometries of [Pt(Hdmg)<sub>2</sub>]<sup>a</sup>.

| Bond length / Å                   | Exp. 1   | Exp. 2   | Calc. 1 | Calc. 2 | Our results |
|-----------------------------------|----------|----------|---------|---------|-------------|
| M–N <sub>3</sub>                  | 1.98(1)  | 1.97(2)  | 1.984   | 1.976   | 1.994       |
| M–N <sub>6</sub>                  | 1.99(1)  | 1.95(2)  | 2.002   | 1.994   | 2.002       |
| N <sub>3</sub> –O <sub>2</sub>    | 1.35(2)  | 1.34(2)  | 1.347   | 1.351   | 1.353       |
| N <sub>6</sub> –O <sub>7</sub>    | 1.35(2)  | 1.37(2)  | 1.277   | 1.279   | 1.288       |
| O <sub>2</sub> –H <sub>1</sub>    | 1.06(1)  | 1.04(1)  | 1.014   | 1.014   | 1.013       |
| O <sub>2</sub> ···O <sub>14</sub> | 2.64(2)  | 2.62(2)  | 2.661   | 2.666   | 2.682       |
| H <sub>1</sub> ···O <sub>14</sub> | 1.63(1)  | 1.57(1)  | 1.660   | 1.667   | 1.669       |
| N <sub>3</sub> –C <sub>4</sub>    | 1.28 (3) | 1.30(2)  | 1.299   | 1.299   | 1.285       |
| C <sub>4</sub> –C <sub>5</sub>    | 1.42(3)  | 1.46(3)  | 1.464   | 1.461   | 1.479       |
| C <sub>5</sub> –N <sub>6</sub>    | 1.31(2)  | 1.31(2)  | 1.318   | 1.316   | 1.299       |
| C <sub>4</sub> –C <sub>4</sub> '  | 1.51(3)  | 1.50(3)  | 1.490   | 1.487   | 1.487       |
| C <sub>5</sub> –C <sub>5</sub> '  | 1.47(3)  | 1.51(3)  | 1.490   | 1.487   | 1.489       |
| Angles / °                        | Exp. 1   | Exp. 2   | Calc. 1 | Calc. 2 | Our results |
| N <sub>3</sub> –M–N <sub>6</sub>  | 78.2(5)  | 78.2(7)  | 79.6    | 79.5    | 79.0        |
| N <sub>6</sub> –M–N <sub>10</sub> | 101.8(7) | 101.8(7) | 100.4   | 100.5   | 101.0       |

|                                                    |          |          |       |       |       |
|----------------------------------------------------|----------|----------|-------|-------|-------|
| M–N <sub>3</sub> –C <sub>4</sub>                   | 116.8(1) | 118.0(1) | 116.1 | 116.4 | 116.6 |
| M–N <sub>6</sub> –C <sub>5</sub>                   | 115.9(1) | 119.0(1) | 115.1 | 115.4 | 115.9 |
| N <sub>3</sub> –O <sub>2</sub> –H <sub>1</sub>     | 111.9(8) | 101.2(1) | 103.4 | 103.6 | 103.6 |
| C <sub>4</sub> –N <sub>3</sub> –O <sub>2</sub>     | 123.2(1) | 121.0(2) | 121.8 | 121.1 | 121.8 |
| C <sub>5</sub> –N <sub>6</sub> –O <sub>7</sub>     | 125.0(1) | 123.0(2) | 125.0 | 124.6 | 123.9 |
| O <sub>2</sub> –H <sub>1</sub> ...O <sub>14</sub>  | 159.0(1) | 179.4(1) | 168.7 | 167.4 | 168.9 |
| N <sub>13</sub> –O <sub>14</sub> ...H <sub>1</sub> | 108.0(5) | 97.4(1)  | 105.6 | 106.0 | 105.6 |
| C <sub>5</sub> –C <sub>4</sub> –N <sub>3</sub>     | 115.3(2) | 114.0(2) | 114.9 | 114.6 | 114.3 |
| C <sub>4</sub> –C <sub>5</sub> –N <sub>6</sub>     | 113.9(2) | 112.0(2) | 114.2 | 114.0 | 114.2 |
| C <sub>5</sub> –C <sub>4</sub> –C <sub>4</sub> '   | 124.1(2) | 123.0(2) | 122.4 | 122.8 | 122.3 |
| C <sub>4</sub> –C <sub>5</sub> –C <sub>5</sub> '   | 126.6(2) | 127.0(2) | 123.8 | 124.1 | 124.6 |

<sup>a</sup> Exp. 1: experimental data from Ref. 5. Exp. 2: experimental data from Ref. 4. Calc. 1: calculated data from Ref. 18. Calc. 2: calculated data from Ref. 9. Our results: solvent: DMSO(CPCM), Ref 10,11; functional: M06-2X, Ref. 12; basis set: def2TZVP, Ref. 13 for C, H, N, O and LANL2DZ ecp(60/18) for Pt, Ref. 14-17.

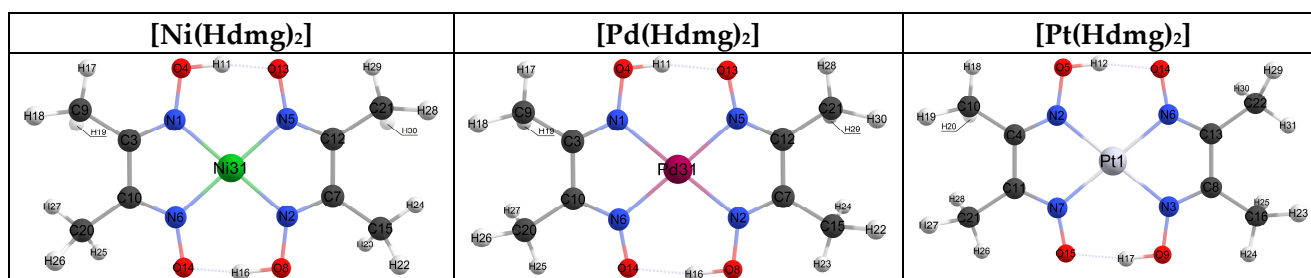

**Figure S1.** The optimised structures in the  $S_0$  ground state for  $[M(\text{Hdmg})_2]$  ( $M = \text{Ni, Pd, Pt}$ ); M06-2X/def2TZVP/LANL2DZ ecp/CPCM(DMSO) level of theory. Note that the number refers to Table S5 and is different from Tables S2 to S4.

**Table S5.** The XYZ coordinates of the optimised ground state for  $[M(\text{Hdmg})_2]$  ( $M = \text{Ni, Pd, Pt}$ ); M06-2X/def2TZVP/LANL2DZ ecp/CPCM(DMSO) level of theory.<sup>a</sup>

| [Ni(Hdmg) <sub>2</sub> ] |                 |          |          | [Pd(Hdmg) <sub>2</sub> ] |                 |          |          | [Pt(Hdmg) <sub>2</sub> ] |                 |          |          |
|--------------------------|-----------------|----------|----------|--------------------------|-----------------|----------|----------|--------------------------|-----------------|----------|----------|
| Atom                     | Coordinates (Å) |          |          | Atom                     | Coordinates (Å) |          |          | Atom                     | Coordinates (Å) |          |          |
|                          | X               | Y        | Z        |                          | X               | Y        | Z        |                          | X               | Y        | Z        |
| N1                       | 1.451518        | -1.2544  | -0.00187 | N1                       | 1.567954        | 1.26643  | -0.00733 | Pt1                      | -0.00131        | -0.00131 | -0.00052 |
| N2                       | -1.44124        | 1.235723 | -0.00061 | N2                       | -1.56904        | -1.26677 | 0.007378 | N2                       | 1.546623        | 1.255674 | -0.00303 |
| C3                       | 2.619085        | -0.73027 | -0.00349 | C3                       | 2.724358        | 0.714635 | -0.00374 | N3                       | -1.54998        | -1.25787 | 0.004221 |
| O4                       | 1.284163        | -2.58923 | -0.0046  | O4                       | 1.4159          | 2.610199 | -0.00339 | C4                       | 2.715608        | 0.724064 | -0.00072 |
| N5                       | -1.43623        | -1.2833  | 0.003468 | N5                       | -1.53095        | 1.307239 | -0.00443 | O5                       | 1.376758        | 2.598443 | 0.003515 |
| N6                       | 1.425195        | 1.26529  | 0.003899 | N6                       | 1.532053        | -1.30762 | 0.004354 | N6                       | -1.53498        | 1.282633 | -0.00403 |
| C7                       | -2.61228        | 0.721404 | -0.00314 | C7                       | -2.72494        | -0.71395 | 0.003646 | N7                       | 1.534116        | -1.29172 | -0.00096 |
| O8                       | -1.28931        | 2.57126  | -0.00524 | O8                       | -1.41908        | -2.61093 | 0.003255 | C8                       | -2.72122        | -0.72882 | 0.003316 |
| C9                       | 3.884306        | -1.51149 | -0.00487 | C9                       | 4.004451        | 1.474343 | 0.005423 | O9                       | -1.37359        | -2.59957 | 0.006814 |
| C10                      | 2.608979        | 0.755579 | -0.00303 | C10                      | 2.712713        | -0.77064 | 0.002608 | C10                      | 3.979546        | 1.506921 | 0.010008 |
| H11                      | 0.235578        | -2.69071 | 0.00228  | H11                      | 0.414086        | 2.727944 | -0.00762 | C11                      | 2.717368        | -0.75585 | 0.001526 |
| C12                      | -2.61718        | -0.76468 | 0.000975 | C12                      | -2.71201        | 0.771422 | -0.00248 | H12                      | 0.373978        | 2.711332 | -0.00482 |
| O13                      | -1.21376        | -2.56836 | 0.008749 | O13                      | -1.283          | 2.570877 | 0.00067  | C13                      | -2.71997        | 0.750672 | -0.00092 |
| O14                      | 1.216801        | 2.551137 | 0.016365 | O14                      | 1.285234        | -2.5713  | -0.00051 | O14                      | -1.31691        | 2.552487 | -0.00803 |
| C15                      | -3.84483        | 1.555307 | -0.00999 | C15                      | -4.00574        | -1.47244 | -0.00584 | O15                      | 1.2964          | -2.56009 | -0.0103  |
| H16                      | -0.24544        | 2.684373 | 0.003257 | H16                      | -0.41824        | -2.73013 | 0.007507 | C16                      | -3.97894        | -1.52242 | 0.005615 |
| H17                      | 3.674434        | -2.57484 | 0.051726 | H17                      | 3.828939        | 2.527305 | -0.1924  | H17                      | -0.36644        | -2.70667 | 0.00206  |
| H18                      | 4.505049        | -1.21473 | 0.841846 | H18                      | 4.685469        | 1.066087 | -0.74113 | H18                      | 3.785761        | 2.556075 | -0.19077 |
| H19                      | 4.44871         | -1.30209 | -0.9154  | H19                      | 4.484305        | 1.36953  | 0.98079  | H19                      | 4.669223        | 1.108807 | -0.73412 |
| C20                      | 3.835291        | 1.599349 | -0.00369 | C20                      | 3.971027        | -1.57019 | -0.00402 | H20                      | 4.458947        | 1.412934 | 0.986775 |
| C21                      | -3.8738         | -1.56252 | 0.002429 | C21                      | -3.9696         | 1.57208  | 0.004833 | C21                      | 3.974311        | -1.55414 | -0.00368 |
| H22                      | -3.84635        | 2.21198  | 0.861132 | H22                      | -4.48554        | -1.36647 | -0.98112 | C22                      | -3.94536        | 1.596229 | -0.00143 |
| H23                      | -3.84991        | 2.192358 | -0.89572 | H23                      | -3.83126        | -2.52569 | 0.191277 | H23                      | -4.57416        | -1.27445 | -0.87445 |



|      |          |          |          |      |          |          |          |     |          |          |          |
|------|----------|----------|----------|------|----------|----------|----------|-----|----------|----------|----------|
| H24  | -4.74122 | 0.942923 | -0.00191 | H24  | -4.68633 | -1.06404 | 0.741032 | H24 | -3.76123 | -2.58567 | 0.006515 |
| H25  | 3.734931 | 2.38522  | -0.75269 | H25  | 3.740252 | -2.60307 | 0.24446  | H25 | -4.57224 | -1.27266 | 0.886497 |
| H26  | 3.958724 | 2.088501 | 0.965174 | H26  | 4.443788 | -1.54643 | -0.9886  | H26 | 3.747612 | -2.58225 | 0.267405 |
| H27  | 4.72499  | 1.011823 | -0.21415 | H27  | 4.686775 | -1.17581 | 0.717457 | H27 | 4.435846 | -1.55022 | -0.9939  |
| H28  | -4.4789  | -1.32874 | 0.880321 | H28  | -3.73805 | 2.604831 | -0.24338 | H28 | 4.697056 | -1.14466 | 0.70205  |
| H29  | -3.62758 | -2.62043 | 0.009637 | H29  | -4.44195 | 1.548339 | 0.9896   | H29 | -3.9523  | 2.243195 | -0.88043 |
| H30  | -4.47344 | -1.33938 | -0.88193 | H30  | -4.68599 | 1.17858  | -0.71647 | H30 | -3.95232 | 2.244224 | 0.876864 |
| Ni31 | 0.000181 | -0.01014 | 0.001386 | Pd31 | 0.00021  | -0.00061 | -8.7E-05 | H31 | -4.84767 | 0.990851 | -0.00096 |

<sup>a</sup> Atom numbering as in Figure S1.

**Table S6.** Compositions (%) of frontier MOs in the  $S_0$  ground state for  $[M(\text{Hdmg})_2]$  ( $M = \text{Ni, Pd, Pt}$ ) <sup>a</sup>.

| [M(Hdmg) <sub>2</sub> ]  | MO      | Energy (eV) | Component (%) |                   |
|--------------------------|---------|-------------|---------------|-------------------|
|                          |         |             | M             | Hdmg <sup>-</sup> |
| [Ni(Hdmg) <sub>2</sub> ] | LUMO+12 | 3.369       | 0             | 100               |
|                          | LUMO+11 | 3.138       | 1             | 99                |
|                          | LUMO+10 | 3.003       | 0             | 100               |
|                          | LUMO+9  | 2.450       | 3             | 97                |
|                          | LUMO+8  | 2.350       | 0             | 100               |
|                          | LUMO+7  | 2.258       | 1             | 99                |
|                          | LUMO+6  | 1.091       | 12            | 88                |
|                          | LUMO+5  | 0.750       | 17            | 83                |
|                          | LUMO+4  | 0.695       | 30            | 70                |
|                          | LUMO+3  | 0.558       | 95            | 5                 |
|                          | LUMO+2  | 0.057       | 45            | 55                |
|                          | LUMO+1  | -0.469      | 3             | 97                |
|                          | LUMO    | -1.290      | 9             | 91                |
|                          | HOMO    | -7.592      | 0             | 100               |
|                          | HOMO-1  | -7.753      | 4             | 96                |
|                          | HOMO-2  | -8.623      | 1             | 99                |
|                          | HOMO-3  | -9.270      | 18            | 82                |
|                          | HOMO-4  | -9.567      | 14            | 86                |
|                          | HOMO-5  | -10.018     | 0             | 100               |
|                          | HOMO-6  | -10.384     | 66            | 34                |
|                          | HOMO-7  | -10.505     | 2             | 98                |
|                          | HOMO-8  | -11.336     | 88            | 12                |
|                          | HOMO-9  | -11.533     | 85            | 15                |
|                          | HOMO-10 | -11.534     | 6             | 94                |
|                          | HOMO-11 | -11.726     | 47            | 53                |
|                          | HOMO-12 | -12.375     | 21            | 79                |
| [Pd(Hdmg) <sub>2</sub> ] | LUMO+12 | 3.308       | 0             | 100               |
|                          | LUMO+11 | 3.096       | 0             | 100               |
|                          | LUMO+10 | 3.002       | 1             | 99                |
|                          | LUMO+9  | 2.507       | 5             | 95                |
|                          | LUMO+8  | 2.395       | 1             | 99                |
|                          | LUMO+7  | 2.268       | 0             | 100               |
|                          | LUMO+6  | 1.306       | 10            | 90                |
|                          | LUMO+5  | 0.855       | 13            | 87                |
|                          | LUMO+4  | 0.781       | 20            | 80                |
|                          | LUMO+3  | 0.617       | 92            | 8                 |
|                          | LUMO+2  | -0.087      | 28            | 72                |
|                          | LUMO+1  | -0.387      | 5             | 95                |
|                          | LUMO    | -1.242      | 8             | 92                |

|                          |         |         |    |     |
|--------------------------|---------|---------|----|-----|
|                          | HOMO    | -7.609  | 7  | 93  |
|                          | HOMO-1  | -7.655  | 1  | 99  |
|                          | HOMO-2  | -8.282  | 3  | 97  |
|                          | HOMO-3  | -8.896  | 58 | 42  |
|                          | HOMO-4  | -9.419  | 45 | 55  |
|                          | HOMO-5  | -9.937  | 53 | 47  |
|                          | HOMO-6  | -10.146 | 0  | 100 |
|                          | HOMO-7  | -10.453 | 88 | 12  |
|                          | HOMO-8  | -10.506 | 3  | 97  |
|                          | HOMO-9  | -10.987 | 70 | 30  |
|                          | HOMO-10 | -11.082 | 86 | 14  |
|                          | HOMO-11 | -11.751 | 1  | 99  |
|                          | HOMO-12 | -11.958 | 30 | 70  |
| [Pt(Hdmg) <sub>2</sub> ] | LUMO+12 | 3.290   | 0  | 100 |
|                          | LUMO+11 | 3.082   | 0  | 100 |
|                          | LUMO+10 | 2.949   | 2  | 98  |
|                          | LUMO+9  | 2.873   | 12 | 88  |
|                          | LUMO+8  | 2.387   | 1  | 99  |
|                          | LUMO+7  | 2.144   | 0  | 100 |
|                          | LUMO+6  | 1.596   | 5  | 95  |
|                          | LUMO+5  | 1.251   | 21 | 79  |
|                          | LUMO+4  | 1.015   | 10 | 90  |
|                          | LUMO+3  | 0.911   | 18 | 82  |
|                          | LUMO+2  | 0.732   | 90 | 10  |
|                          | LUMO+1  | -0.327  | 9  | 91  |
|                          | LUMO    | -1.480  | 6  | 94  |
|                          | HOMO    | -7.542  | 18 | 82  |
|                          | HOMO-1  | -7.735  | 0  | 100 |
|                          | HOMO-2  | -8.522  | 3  | 97  |
|                          | HOMO-3  | -8.794  | 84 | 16  |
|                          | HOMO-4  | -9.004  | 63 | 37  |
|                          | HOMO-5  | -9.691  | 47 | 53  |
|                          | HOMO-6  | -9.822  | 84 | 16  |
|                          | HOMO-7  | -10.234 | 0  | 100 |
|                          | HOMO-8  | -10.589 | 77 | 23  |
|                          | HOMO-9  | -10.784 | 5  | 95  |
|                          | HOMO-10 | -10.804 | 43 | 57  |
|                          | HOMO-11 | -11.843 | 2  | 98  |
|                          | HOMO-12 | -12.116 | 14 | 86  |

<sup>a</sup> Solvent: DMSO(CPCM), Ref. 10,11; functional: M06-2X, Ref. 12; basis set: For C H N O: def2TZVP, Ref. 13 and for Ni, Pd, Pt: LANL2DZ ecp, Ref. 14-17.

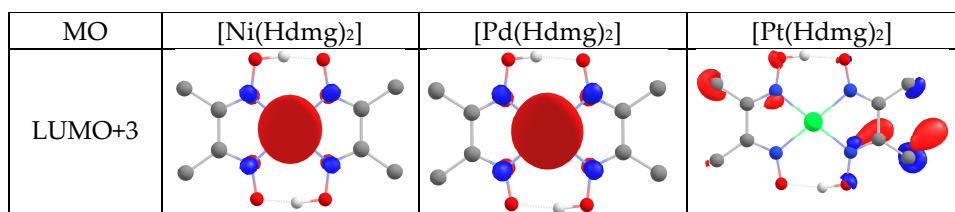

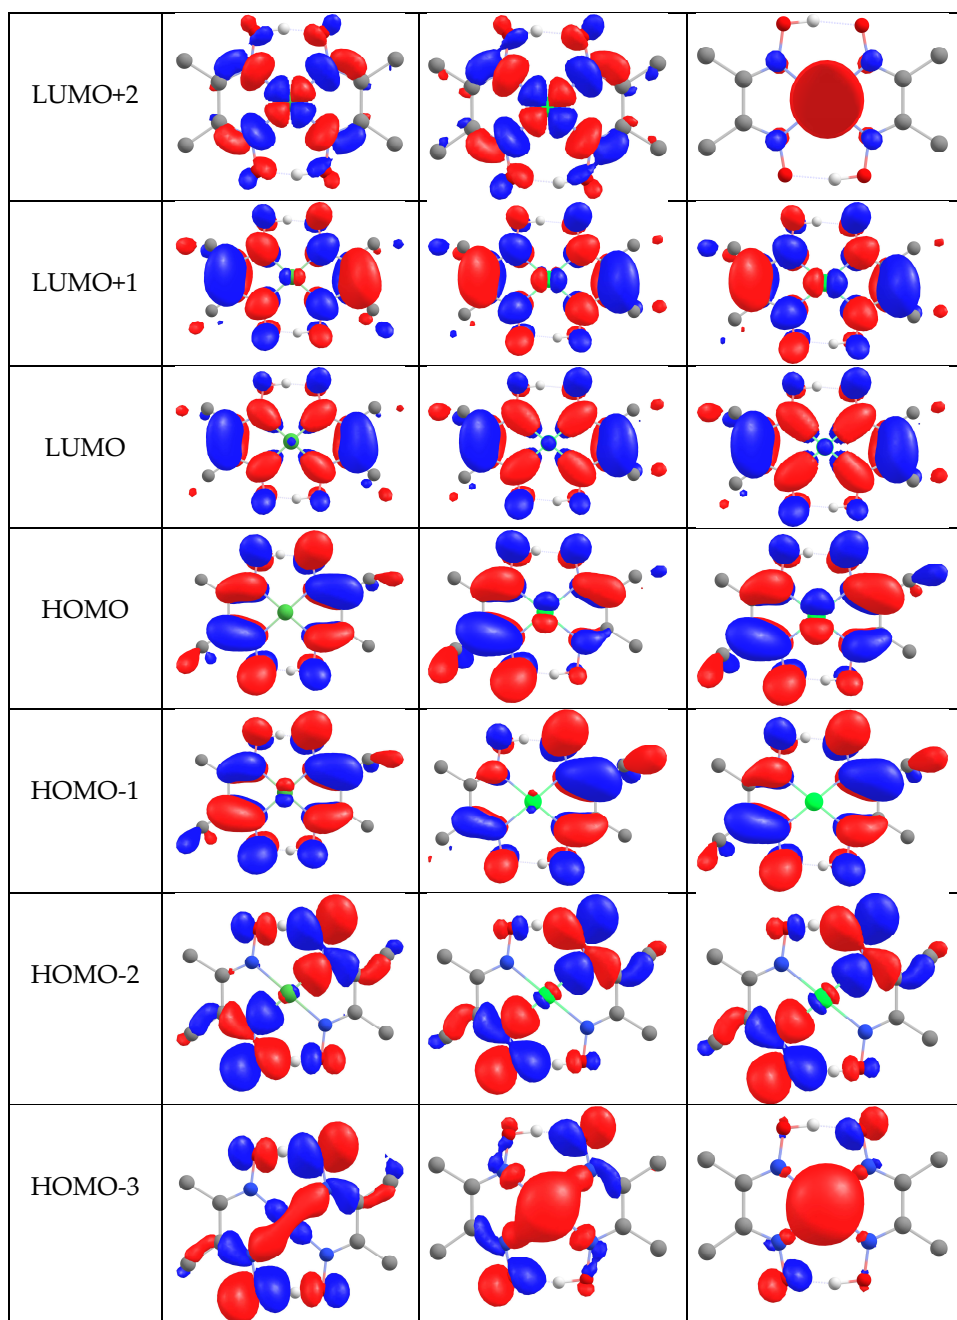

**Figure S1.** Frontier orbital landscape in the  $S_0$  ground state for  $[M(\text{Hdmg})_2]$  ( $M = \text{Ni}, \text{Pd}, \text{Pt}$ ); M06-2X/def2TZVP/LANL2DZ ecp/CPCM(DMSO) level of theory.

**Table S7.** Compositions (%) of frontier MOs in the  $T_1$  excited state for  $[M(\text{Hdmg})_2]$  ( $M = \text{Ni}, \text{Pd}, \text{Pt}$ ) <sup>a</sup>.

| $[M(\text{Hdmg})_2]$     | MO      | Energy (eV) | Component (%) |                   |
|--------------------------|---------|-------------|---------------|-------------------|
|                          |         |             | M             | Hdmg <sup>-</sup> |
| [Ni(Hdmg) <sub>2</sub> ] | HSOMO+3 | 0.627       | 93            | 7                 |
|                          | HSOMO+2 | 0.504       | 32            | 68                |
|                          | HSOMO+1 | -1.207      | 5             | 95                |
|                          | HSOMO   | -5.637      | 5             | 95                |

|                          |         |        |    |    |
|--------------------------|---------|--------|----|----|
|                          | LSOMO   | -7.779 | 6  | 94 |
|                          | LSOMO-1 | -8.601 | 5  | 95 |
|                          | LSOMO-2 | -9.082 | 7  | 93 |
|                          | LSOMO-3 | -9.171 | 7  | 93 |
| [Pd(Hdmg) <sub>2</sub> ] | HSOMO+3 | 0.644  | 91 | 9  |
|                          | HSOMO+2 | 0.096  | 26 | 74 |
|                          | HSOMO+1 | -1.215 | 6  | 94 |
|                          | HSOMO   | -5.470 | 8  | 92 |
|                          | LSOMO   | -7.618 | 13 | 87 |
|                          | LSOMO-1 | -8.496 | 36 | 64 |
|                          | LSOMO-2 | -8.798 | 9  | 91 |
|                          | LSOMO-3 | -9.121 | 7  | 93 |
| [Pt(Hdmg) <sub>2</sub> ] | HSOMO+3 | 0.974  | 13 | 87 |
|                          | HSOMO+2 | 0.731  | 94 | 6  |
|                          | HSOMO+1 | -1.356 | 12 | 88 |
|                          | HSOMO   | -5.458 | 10 | 90 |
|                          | LSOMO   | -7.499 | 26 | 74 |
|                          | LSOMO-1 | -8.710 | 66 | 34 |
|                          | LSOMO-2 | -8.717 | 13 | 87 |
|                          | LSOMO-3 | -9.173 | 63 | 37 |

<sup>a</sup> Solvent: DMSO(CPCM), Ref. 10,11; functional: M06-2X, Ref. 12; basis set: For C H N O: def2TZVP, Ref. 13, and for Ni, Pd, Pt: LANL2DZ ecp, Ref. 14-17.

| MO      | [Ni(Hdmg) <sub>2</sub> ] | [Pd(Hdmg) <sub>2</sub> ] | [Pt(Hdmg) <sub>2</sub> ] |
|---------|--------------------------|--------------------------|--------------------------|
| HSOMO+3 |                          |                          |                          |
| HSOMO+2 |                          |                          |                          |
| HSOMO+1 |                          |                          |                          |
| HSOMO   |                          |                          |                          |

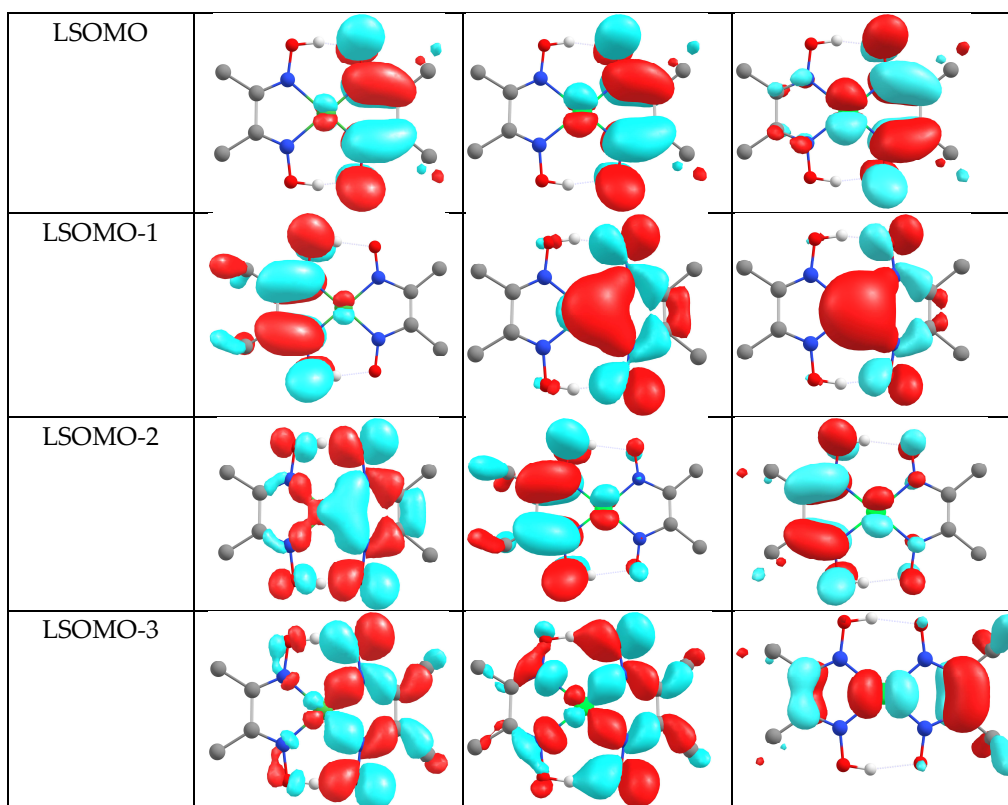

**Figure S3.** Frontier orbital landscape in the  $T_1$  excited state for  $[M(\text{Hdmg})_2]$  ( $M = \text{Ni}, \text{Pd}, \text{Pt}$ ); M06-2X/def2TZVP/LANL2DZ ecp/CPCM(DMSO) level of theory.

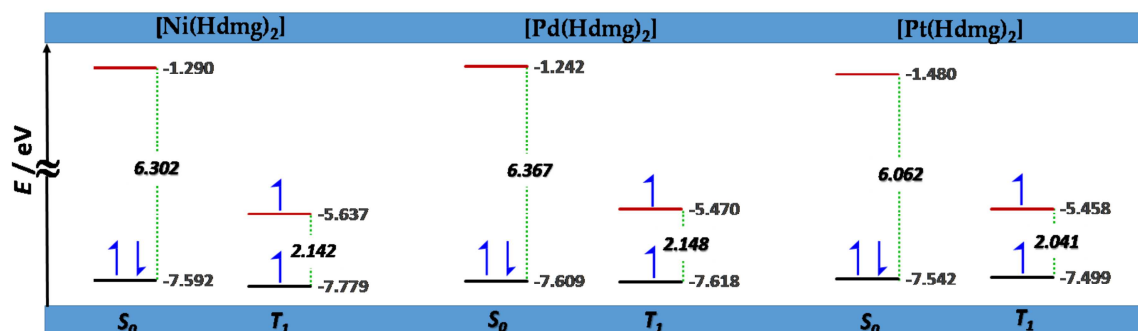

**Figure S4.** Energy diagrams of frontier MOs for  $[M(\text{Hdmg})_2]$  ( $M = \text{Ni}, \text{Pd}, \text{Pt}$ ) at the optimised  $S_0$  and  $T_1$  geometry; M06-2X/def2TZVP/LANL2DZ ecp/CPCM(DMSO) level of theory.

**Table S8.** Wavelengths and character of calculated transitions for  $[\text{Ni}(\text{Hdmg})_2]$  <sup>a</sup>.

| Excited state            | Oscillator Strength | Calculated $\lambda$ (nm) | Transitions (Major Contribution)                             | Assignment                             |
|--------------------------|---------------------|---------------------------|--------------------------------------------------------------|----------------------------------------|
| $S_0 \rightarrow S_6$    | 0.1507              | 309.48                    | H-1 $\rightarrow$ LUMO (79%)<br>HOMO $\rightarrow$ L+1 (12%) | $\pi-\pi^*$                            |
| $S_0 \rightarrow S_{11}$ | 0.0377              | 247.81                    | HOMO $\rightarrow$ L+1 (72%)<br>H-1 $\rightarrow$ LUMO (17%) | $\pi-\pi^*$                            |
| $S_0 \rightarrow S_{15}$ | 0.3175              | 212.94                    | H-2 $\rightarrow$ L+2 (67%)<br>H-4 $\rightarrow$ LUMO (14%)  | $\pi-\pi^*$<br>$\pi-\pi^*/\text{MLCT}$ |

|                          |        |        |                                                                                                                           |                                                                |
|--------------------------|--------|--------|---------------------------------------------------------------------------------------------------------------------------|----------------------------------------------------------------|
| $S_0 \rightarrow S_{16}$ | 0.6855 | 210.74 | HOMO $\rightarrow$ L+1 (13%)<br>H-4 $\rightarrow$ LUMO (74%)<br>H-2 $\rightarrow$ L+2 (13%)                               | $\pi-\pi^*$<br>$\pi-\pi^*/\text{MLCT}$<br>$\pi-\pi^*$          |
| $S_0 \rightarrow S_{29}$ | 0.0837 | 181.74 | H-8 $\rightarrow$ LUMO (77%)                                                                                              | MLCT/ $\pi-\pi^*$                                              |
| $S_0 \rightarrow S_{32}$ | 0.3173 | 177.67 | H-9 $\rightarrow$ LUMO (54%)<br>H-7 $\rightarrow$ L+2 (15%)<br>H-8 $\rightarrow$ LUMO (13%)                               | MLCT/ $\pi-\pi^*$<br>$\pi-\pi^*$<br>MLCT/ $\pi-\pi^*$          |
| $S_0 \rightarrow S_{39}$ | 0.355  | 171.27 | H-5 $\rightarrow$ L+1 (10%)<br>H-2 $\rightarrow$ L+6 (26%)<br>H-7 $\rightarrow$ L+2 (19%)<br>H-9 $\rightarrow$ LUMO (12%) | $\pi-\pi^*$<br>$\pi-\pi^*$<br>$\pi-\pi^*$<br>MLCT/ $\pi-\pi^*$ |
| $S_0 \rightarrow S_{41}$ | 0.3292 | 169.66 | HOMO $\rightarrow$ L+7 (10%)<br>H-2 $\rightarrow$ L+6 (41%)<br>H-7 $\rightarrow$ L+2 (12%)                                | $\pi-\pi^*$<br>$\pi-\pi^*$<br>$\pi-\pi^*$                      |
| $S_0 \rightarrow S_{44}$ | 0.0776 | 165.35 | H-3 $\rightarrow$ L+5 (11%)<br>H-5 $\rightarrow$ L+1 (54%)<br>H-7 $\rightarrow$ L+2 (18%)                                 | $\pi-\pi^*/\text{MLCT}$<br>$\pi-\pi^*$<br>$\pi-\pi^*$          |

<sup>a</sup> Solvent: DMSO(CPCM), Ref. 10,11: functional: M06-2X, Ref. 12; basis set: For C, H, N, O: def2TZVP, Ref. 13, and for Ni: LANL2DZ ecp(10/18), Ref. 14-17; H and L are abbreviation for HOMO and LUMO, respectively.

**Table S9.** Wavelengths and character of calculated transitions for [Pd(Hdmg)<sub>2</sub>]<sup>a</sup>.

| Excited state            | Oscillator Strength | Calculated $\lambda$ (nm) | Transitions (Major Contribution)                                                                                          | Assignment                                                     |
|--------------------------|---------------------|---------------------------|---------------------------------------------------------------------------------------------------------------------------|----------------------------------------------------------------|
| $S_0 \rightarrow S_3$    | 0.0917              | 312.11                    | H-1 $\rightarrow$ LUMO (48%)<br>HOMO $\rightarrow$ LUMO (35%)                                                             | $\pi-\pi^*$<br>$\pi-\pi^*$                                     |
| $S_0 \rightarrow S_{11}$ | 0.0652              | 238.84                    | HOMO $\rightarrow$ L+1 (26%)<br>H-1 $\rightarrow$ L+1 (19%)<br>H-2 $\rightarrow$ L+1 (17%)                                | $\pi-\pi^*$<br>$\pi-\pi^*$<br>$\pi-\pi^*$                      |
| $S_0 \rightarrow S_{14}$ | 0.382               | 231.28                    | H-4 $\rightarrow$ LUMO (82%)                                                                                              | $\pi-\pi^*/\text{MLCT}$                                        |
| $S_0 \rightarrow S_{20}$ | 0.2534              | 197.45                    | H-7 $\rightarrow$ LUMO (23%)<br>H-2 $\rightarrow$ L+2 (22%)<br>H-8 $\rightarrow$ L+1 (16%)<br>H-6 $\rightarrow$ L+1 (10%) | MLCT/ $\pi-\pi^*$<br>$\pi-\pi^*$<br>$\pi-\pi^*$<br>$\pi-\pi^*$ |
| $S_0 \rightarrow S_{21}$ | 0.2101              | 196.36                    | H-2 $\rightarrow$ L+2 (29%)<br>H-9 $\rightarrow$ LUMO (22%)<br>H-6 $\rightarrow$ L+1 (16%)                                | $\pi-\pi^*$<br>MLCT/ $\pi-\pi^*$<br>$\pi-\pi^*$                |
| $S_0 \rightarrow S_{29}$ | 0.114               | 184.43                    | H-11 $\rightarrow$ LUMO (23%)<br>H-7 $\rightarrow$ L+1 (22%)<br>H-9 $\rightarrow$ LUMO (10%)                              | $\pi-\pi^*$<br>MLCT/ $\pi-\pi^*$<br>MLCT/ $\pi-\pi^*$          |
| $S_0 \rightarrow S_{30}$ | 0.3772              | 184.08                    | H-9 $\rightarrow$ LUMO (34%)<br>H-8 $\rightarrow$ L+1 (11%)                                                               | MLCT/ $\pi-\pi^*$<br>$\pi-\pi^*$                               |
| $S_0 \rightarrow S_{38}$ | 0.4475              | 170.73                    | HOMO $\rightarrow$ L+7 (19%)<br>HOMO $\rightarrow$ L+8 (16%)<br>H-1 $\rightarrow$ L+7 (12%)                               | $\pi-\pi^*$<br>$\pi-\pi^*$<br>$\pi-\pi^*$                      |
| $S_0 \rightarrow S_{41}$ | 0.2158              | 169.09                    | H-6 $\rightarrow$ L+2 (23%)<br>HOMO $\rightarrow$ L+6 (12%)<br>H-6 $\rightarrow$ L+1 (11%)                                | $\pi-\pi^*$<br>$\pi-\pi^*$<br>$\pi-\pi^*$                      |
| $S_0 \rightarrow S_{43}$ | 0.0936              | 167.29                    | H-3 $\rightarrow$ L+3 (58%)                                                                                               | d-p/MLCT/ $\pi-\pi^*$                                          |
| $S_0 \rightarrow S_{43}$ | 0.0753              | 165.68                    | H-6 $\rightarrow$ L+2 (35%)                                                                                               | $\pi-\pi^*$                                                    |

H-6→L+1 (17%)  $\pi-\pi^*$   
H-2→L+6 (11%)  $\pi-\pi^*$

<sup>a</sup> Solvent: DMSO, DMSO(CPCM), Ref. 10,11: functional: M06-2X, Ref. 12; basis set: For C, H, N, O: def2TZVP, Ref. 13, and for Pd,: LANL2DZ ecp(28/18), Ref. 14-17; H and L are abbreviation for HOMO and LUMO, respectively.

**Table S10.** Wavelengths and character of calculated transitions for [Pt(Hdmg)<sub>2</sub>]<sup>a</sup>.

| Excited state            | Oscillator Strength | Calculated $\lambda$ (nm) | Transitions (Major Contribution) | Assignment              |
|--------------------------|---------------------|---------------------------|----------------------------------|-------------------------|
| $S_0 \rightarrow S_1$    | 0.0687              | 349.82                    | HOMO→LUMO (90%)                  | $\pi-\pi^*/\text{MLCT}$ |
| $S_0 \rightarrow S_8$    | 0.4486              | 252.79                    | H-4→LUMO (90%)                   | MLCT/ $\pi-\pi^*$       |
| $S_0 \rightarrow S_{10}$ | 0.2385              | 237.21                    | H-1→L+1 (74%)                    | $\pi-\pi^*$             |
|                          |                     |                           | H-6→LUMO (16%)                   | MLCT/ $\pi-\pi^*$       |
| $S_0 \rightarrow S_{29}$ | 0.186               | 186.54                    | H-10→LUMO (77%)                  | $\pi-\pi^*/\text{MLCT}$ |
|                          |                     |                           | H-7→L+1 (13%)                    | $\pi-\pi^*$             |
| $S_0 \rightarrow S_{31}$ | 0.0459              | 180.77                    | H-9→L+1 (48%)                    | $\pi-\pi^*$             |
|                          |                     |                           | H-12→LUMO (16%)                  | $\pi-\pi^*/\text{MLCT}$ |
|                          |                     |                           | H-3→L+2 (15%)                    | d-p/MLCT/ $\pi-\pi^*$   |
| $S_0 \rightarrow S_{32}$ | 0.9052              | 177.32                    | H-2→L+5 (85%)                    | $\pi-\pi^*$             |
| $S_0 \rightarrow S_{34}$ | 0.1484              | 174.91                    | H-3→L+2 (79%)                    | d-p/MLCT/ $\pi-\pi^*$   |
|                          |                     |                           | H-9→L+1 (12%)                    | $\pi-\pi^*$             |
| $S_0 \rightarrow S_{36}$ | 0.468               | 171.43                    | HOMO→L+7 (58%)                   | $\pi-\pi^*/\text{MLCT}$ |
|                          |                     |                           | H-1→L+8 (21%)                    | $\pi-\pi^*$             |
| $S_0 \rightarrow S_{37}$ | 0.0725              | 171.11                    | H-2→L+4 (58%)                    | $\pi-\pi^*$             |
| $S_0 \rightarrow S_{44}$ | 0.0721              | 163.75                    | H-3→L+4 (58%)                    | MLCT/IL                 |
|                          |                     |                           | H-2→L+6 (22%)                    | $\pi-\pi^*$             |

<sup>a</sup> Solvent: DMSO(CPCM), Ref. 10,11: functional: M06-2X, Ref. 12; basis set: For C, H, N, O: def2TZVP, Ref. 13, and for Pt: LANL2DZ ecp(60/10), Ref. 14-17; H and L are abbreviation for HOMO and LUMO, respectively.

## References:

- [1] Williams, D.E.; Wohlauser, G.; Rundle, R.E. Crystal Structures of Nickel and Palladium Dimethylglyoximes. *J. Am. Chem. Soc.* **1959**, *81*(3), 755–756.
- [2] Li, D.-X.; Xu, D.-J.; Xu, Y.-Z. Redetermination of bis(dimethylglyoximato- $[\kappa]^2-N,N'$ )nickel(II). *Acta Crystallogr. Sect. E.* **2003**, *59*(12), m1094–m1095.
- [3] Godycki, L.E.; Rundle, R.E. The structure of nickel dimethylglyoxime, *Acta Cryst.* **1953**, *6*(6), 487–495.
- [4] Hussain, M.S.; Salinas, B.E.V.; Schlemper, E.O. Three-Dimensional Determinations of the Crystal Structures of Bis(dimethylglyoximato)palladium(II) and Bis(dimethylglyoximato)platinum(II). *Acta Crystallogr., Sect. B.* **1979**, *35*(3), 628–633.
- [5] Konno, M.; Okamoto, T.; Shirotani, I. Structure changes and proton transfer between O-O in bis(dimethylglyoximato)platinum(II) at low temperature (150 K) and at high pressures (2.39 and 3.14 GPa). *Acta Crystallogr., Sect. B.* **1989**, *45*(2), 142–147.
- [6] Frasson, E.; Panattoni, C.; Zannetti, R. X-ray studies on the metal complexes with the glyoximes. II. Structure of the Pt-dimethylglyoxime. *Acta Cryst.* **1959**, *12*(12), 1027–1031.

- [7] Bruce-Smith, I.F.; Zakharov, B.A.; Stare, J.; Boldyreva, E.V.; Pulham, C.R. Structural Properties of Nickel Dimethylglyoxime at High Pressure: Single-Crystal X-ray Diffraction and DFT Studies. *J. Phys. Chem. C*. **2014**, *118*(42), 24705–24713.
- [8] Ali, S.Y.; Reddy, K.D.; Manna, A.K. Structural, Electronic, and Spectral Properties of Metal Dimethylglyoximate [M(DMG)<sub>2</sub>; M = Ni<sup>2+</sup>, Cu<sup>2+</sup>] Complexes: A Comparative Theoretical Study. *J. Phys. Chem. A*. **2019**, *123*(42), 9166–9174.
- [9] Kovács, A. Theoretical study of the strong intramolecular hydrogen bond and metal–ligand interactions in group 10 (Ni, Pd, Pt) bis(dimethylglyoximate) complexes. *J. Organomet. Chem.* **2007**, *692*(24), 5383–5389.
- [10] Barone, V.; Cossi, M.; Tomasi, J. A new definition of cavities for the computation of solvation free energies by the polarizable continuum model. *J. Chem. Phys.* **1997**, *107*(8), 3210–3221.
- [11] Cossi, M.; Scalmani, G.; Rega, N.; Barone, V. New developments in the polarizable continuum model for quantum mechanical and classical calculations on molecules in solution. *J. Chem. Phys.* **2002**, *117*(1), 43–54.
- [12] Zhao, Y.; Truhlar, D.G. The M06 suite of density functionals for main group thermochemistry, thermochemical kinetics, noncovalent interactions, excited states, and transition elements: two new functionals and systematic testing of four M06-class functionals and 12 other functionals. *Theor. Chem. Acc.* **2008**, *120*(1), 215–241.
- [13] Weigend, F.; Ahlrichs, R. Balanced basis sets of split valence, triple zeta valence and quadruple zeta valence quality for H to Rn: Design and assessment of accuracy. *Phys.Chem.Chem.Phys.* **2005**, *7*, 3297–3305.
- [14] Roy, L.E.; Hay, P.J.; Martin, R.L. Revised Basis Sets for the LANL Effective Core Potentials. *J. Chem. Theory Comput.* **2008**, *4*(7), 1029–1031.
- [15] McMichael Rohlfing, C.; Hay, P.J., Martin, R.L. An effective core potential investigation of Ni, Pd, and Pt and their monohydrides. *J. Chem. Phys.* **1986**, *85*, 1447–1455.
- [16] Hay, P.J.; Wadt, W.R. Ab initio effective core potentials for molecular calculations – potentials for K to Au including the outermost core orbitals, *J. Chem. Phys.* **1985**, *82*, 299–310.
- [17] Hay, P.J.; Wadt, W.R. “Ab initio effective core potentials for molecular calculations – potentials for the transition-metal atoms Sc to Hg,” *J. Chem. Phys.* **1985**, *82*, 270–283.
- [18] Liu, K.; Orimoto, Y.; Aoki, Y. Theoretical investigation of the pressure-induced insulator-to-metal-to-insulator transitions in one-dimensional bis(dimethylglyoximate) platinum(II), Pt(dmg)<sub>2</sub>. *Polyhedron* **2015**, *87*, 141–146.
